# Supplementary material for: Smallanthus sonchifolius (Yacon) Flour Improves Visceral Adiposity and Metabolic Parameters in High-Fat-Diet-Fed Rats
Source: Hindawi journal article supplement (doi:10.1155/2018/5341384), 2018-10-28
Supplement: f1 [file 5341384.f1.pdf]

## Supplementary material

**Table S1.** Effects of yacon on morphometric parameters of HFD-fed rats

|                       | SD           | HFD                       | HFD Y340                    | HFD Y680                      |
|-----------------------|--------------|---------------------------|-----------------------------|-------------------------------|
| Final body weight (g) | 429.8 ± 21.0 | 615.4 ± 28.8 <sup>a</sup> | 572.77±10.12 <sup>a,b</sup> | 520.28±23.52 <sup>a,b,c</sup> |
| BMI (%)               | 0.71 ±0.09   | 0.95 ± 0.02 <sup>a</sup>  | 0.98±0.05 <sup>a</sup>      | 0.81±0.03 <sup>a,b</sup>      |
| Lee index (g/cm)      | 0.31 ± 0.01  | 0.34 ± 0.01 <sup>a</sup>  | 0.35±0.01 <sup>a</sup>      | 0.32±0.01 <sup>b</sup>        |
| TC (cm)               | 17.50 ± 0.50 | 21.88 ± 1.70 <sup>a</sup> | 18.50 ± 1.06 <sup>b</sup>   | 17.25±0.57 <sup>a,b,c</sup>   |
| AC (cm)               | 17.33 ± 1.04 | 22.20 ± 1.24 <sup>a</sup> | 19.33 ± 0.71 <sup>a,b</sup> | 17.75±0.57 <sup>a,b,c</sup>   |
| AC/TC                 | 1.01 ± 0.02  | 1.09 ± 0.05 <sup>a</sup>  | 1.04 ± 0.03                 | 0.98 ± 0.01 <sup>b</sup>      |

Values are means ± standard deviation (n = 6 rats/group). <sup>a</sup> p < 0.05 compared to the SD. <sup>b</sup> p < 0.05 compared to the HFD. TC, thoracic circumference; AC, abdominal circumference

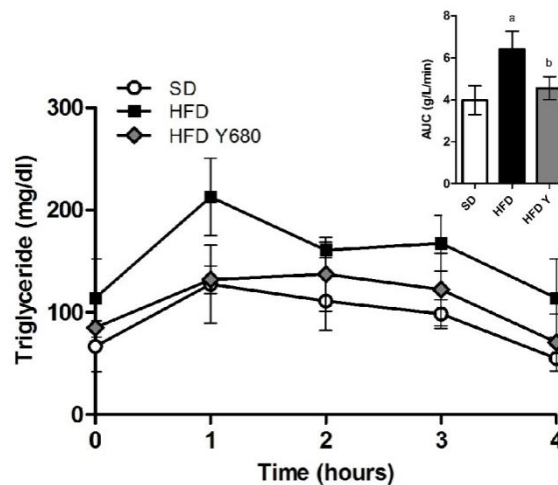

**Figure S1.** Effects of yacon flour on serum triglyceride after oral fat-loading in HFD-fed rats. Time course of triglycerides after a single yacon-tablet (680 mg FOS/kg body weight) followed of normal standard chow administration at 0,1,2,3 and 4 h (Insert: area under the curve of serum triglycerides following 2.5 ml/ kg b.w. of corn oil administration). Data are expressed as the mean ± standard deviation (n = 6 / group). <sup>a</sup>p < 0.05 vs. SD, <sup>b</sup>p < 0.05 vs. HFD. SD: Standard-diet fed rats; HFD: High-fat diet- fed rats; HFD Y680: High-fat diet- fed rats supplemented with yacon flour (680 mg FOS/kg body weight).

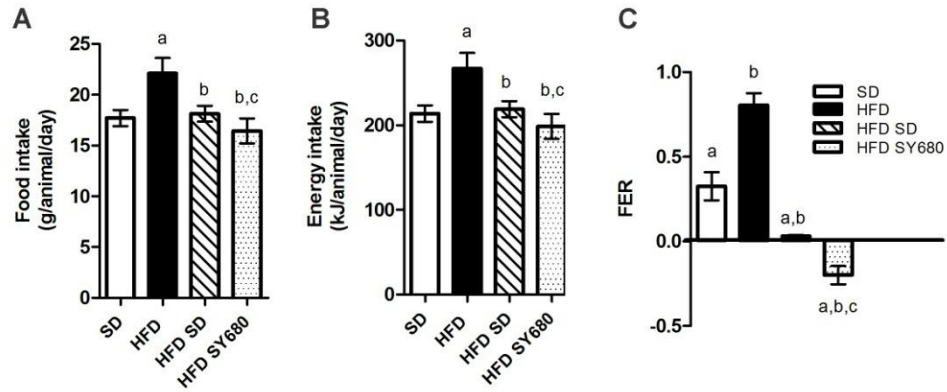

**Figure S2. Effects of yacon supplement and the reversion to a SD diet on HFD-induced metabolic disease.** A: Food intake. B: Energy intake. C: Feed efficiency ratio (FER). Data are mean  $\pm$  standard deviation ( $n = 6$  / group). <sup>a</sup> $p < 0.05$  vs. SD, <sup>b</sup> $p < 0.05$  vs. HFD, <sup>c</sup> $p < 0.05$  vs. HFD SD. SD: Standard-diet fed rats; HFD: High-fat diet- fed rats; HFD SD: High-fat diet- fed rats reversed to a SD diet; HFD SY680: High-fat diet- fed rats reversed to a SD diet and supplemented with yacon flour (680 mg FOS/kg b. w.).
